# Supplementary material for: Associations between dietary behaviours and the mental and physical well-being of Swedish adolescents
Source: Springer Nature journal article supplement (doi:10.1186/s13034-024-00733-z), 2024-03-30
Supplement: MOESM1 [file 26925450]

## Supplementary Appendix: Associations between Dietary behaviors and Mental and Physical Health Among Swedish Adolescents: The Role of Socioeconomic and Demographic Status

*Kenisha Russell Jonsson<sup>1</sup>. Cameron K Bailey. Maria Corell<sup>1</sup>. Petra Löfstedt<sup>1</sup>. Nicholas Kofi Adjei<sup>2,3,4</sup>*

<sup>1</sup> School of Public Health and Community Medicine. Institute of Medicine. Gothenburg University. Box 463. 405 30. Göteborg. Sweden

<sup>2</sup> University of Liverpool. Department of Public Health and Policy. Waterhouse Building 2nd Floor . Block F. Liverpool . L69 3GL. UK

<sup>3</sup> Leibniz Institute for Prevention Research and Epidemiology - BIPS. Bremen. Germany

<sup>4</sup> Health Sciences Bremen. University of Bremen. Bremen. Germany

Corresponding author: Nicholas Kofi Adjei. University of Bremen. Bibliothekstrasse 1. 28359 Bremen. Email: [adjei@uni-bremen.de](mailto:adjei@uni-bremen.de)

**Figure A1. Data inclusion flow chart**

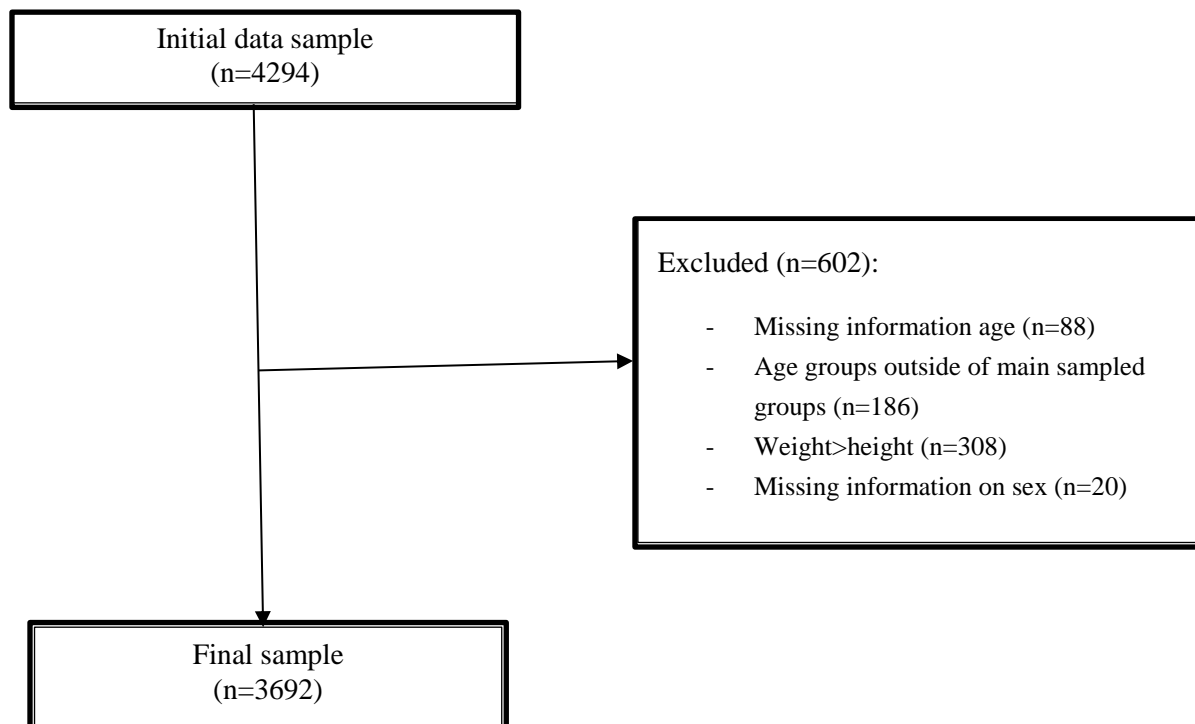

**Figure A2. Directed acyclic graph (DAG) for the current study**

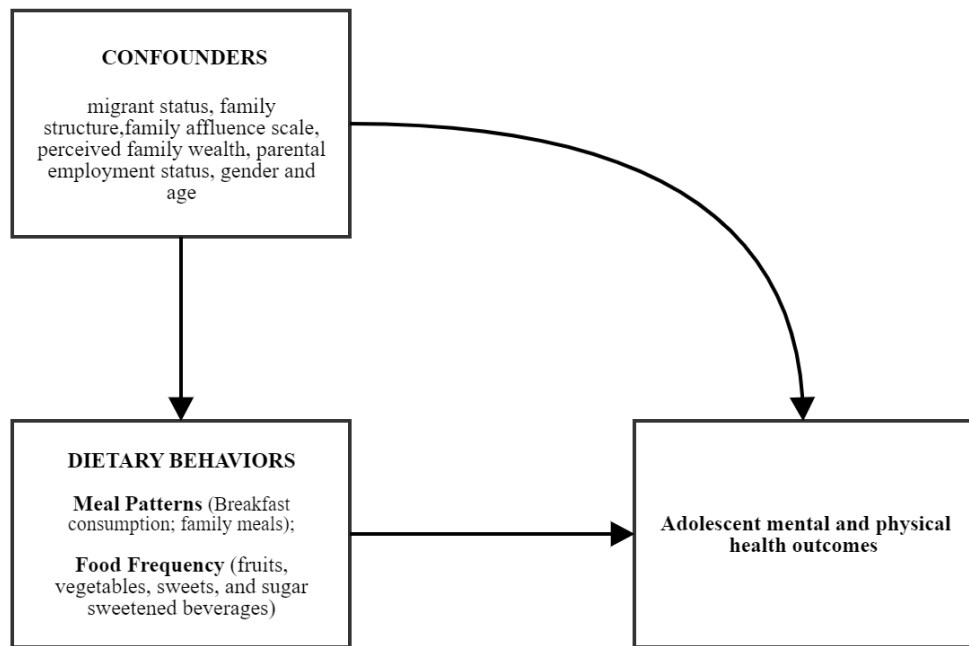



|                 |      |      |      |      |      |      |      |      |      |      |      |      |      |      |      |      |      |      |      |      |      |
|-----------------|------|------|------|------|------|------|------|------|------|------|------|------|------|------|------|------|------|------|------|------|------|
| 1 parent works  | 0.83 | 0    | 1.49 | 2.28 | 1.27 | 4.09 | 1.14 | 0.64 | 2.04 | 0.99 | 0.56 | 1.74 | 0.57 | 0.32 | 0.99 | 0.72 | 0.40 | 1.30 | 0.80 | 0.45 | 1.45 |
| No parents work | 0.74 | 0.57 | 0.95 | 1.36 | 1.08 | 1.73 | 0.98 | 0.75 | 1.27 | 0.84 | 0.66 | 1.07 | 0.85 | 0.67 | 1.09 | 0.82 | 0.64 | 1.05 | 0.93 | 0.72 | 1.19 |

---
